# Supplementary material for: Constructing SnO2–MoSe2heterojunction nanoflowers as high-rate and ultrastable anodes for sodium-ion half/full batteries
Source: Royal Society of Chemistry journal article supplement (doi:10.1039/d3se00195d), 2023-01-01
Supplement: d3se00195d1.pdf [file d3se00195d1.pdf]

## **Constructing SnO<sub>2</sub>-MoSe<sub>2</sub> heterojunction nanoflowers as high-rate and ultrastable anodes for sodium-ion half/full batteries**

Shengkai Li<sup>a</sup>, Haiyan Zhang<sup>a,\*</sup>, Shangshang Zhang<sup>a</sup>, Yan Wan<sup>a</sup>

<sup>a</sup> School of Materials and Energy, Guangdong University of Technology, Guangzhou, 510006, China.

### **Experimental section**

#### **Synthesis of Sn-Mo nanoparticle precursor**

In a typical synthesis, 0.3g CTAB (DaMao Co., China) was dissolved in 800 mL deionized water. 0.3 mol of Na<sub>2</sub>MoO<sub>4</sub> (DaMao Co., China) and 0.3 mol of SnCl<sub>2</sub>·2H<sub>2</sub>O (DaMao Co., China) were sequentially added to the CTAB solution. Then coprecipitation synthesis was used at 40 °C for 6 h. After three suction filtration and water washing, the Sn-Mo nanoparticle precursor was obtained by freeze-dried.

#### **Synthesis of SnO<sub>2</sub>-MoSe<sub>2</sub> heterojunction nanoflowers**

The 0.15 g Sn-Mo precursor and 0.15 g of Se (Innochem Co., China) powder were scattered into 70 mL of deionized water and then stirred vigorously for 2 h. 10 mL of N<sub>2</sub>H<sub>4</sub>·H<sub>2</sub>O (50%, Innochem Co., China) was added dropwise into the above suspension under vigorous stirring, the mixture was poured into an autoclave (100 mL) and reacted at 180 °C for 24 h. After the reaction, the precipitate was washed three times with deionized water and absolute ethanol. Then, SnO<sub>2</sub>-MoSe<sub>2</sub> heterojunction nanoflowers were dried under vacuum at 60 °C for 12 h. In addition, SnO<sub>2</sub> and MoSe<sub>2</sub> were prepared by the same method.

---

\* Corresponding author. E-mail: [hyzhang@gdut.edu.cn](mailto:hyzhang@gdut.edu.cn) (Haiyan Zhang)

## **Materials characterization**

The crystal structures of the obtained active materials and electrode sheets were analyzed by X-ray diffraction (XRD, D/MAX-UItima IV). The microscopic morphology, lattice spacing and elemental distribution of the materials were analyzed by field emission scanning electron microscopy (FESEM, Hitachi/ SU8220) and high-resolution transmission electron microscopy (TEM and HRTEM, Talos F200S). The X-ray photoelectron spectroscopy (XPS, ESCALAB 250Xi) was employed to analyze the compositions of the samples. Emmett and Teller (BET, ASAP2460, Micromeritics) surface area was measured by using N<sub>2</sub> adsorption apparatus.

## **Electrochemical measurements**

The CR2032 coin-type cells were assembled in the glovebox (H<sub>2</sub>O and O<sub>2</sub> < 0.01 ppm). Electrode slurry was prepared by mixing the mass ratio of active material (7), Ketjen black (1.5) and polyvinylidene fluoride (PVDF) (1.5) in N-methyl-pyrrolidone. The slurry was then uniformly applied to copper foil and dried at 80 °C overnight, and finally cut into discs (d = 10 mm). A thin Na plate was used as counter electrode. The glass fiber filter (Whatman GF/A) separator was used as separator and 1 M NaPF<sub>6</sub> in diglyme (100%) was used as electrolyte. For the constructed full cell, commercial NVP (Innochem Co., China) was used as the cathode, respectively. Electrochemical performances of the batteries were investigated on Land battery tester (Wuhan LAND Corporation, China). Cyclic voltammetry (CV) and electrochemical impedance spectroscopy (EIS) curves were tested with an electrochemical workstation (CHI660E).

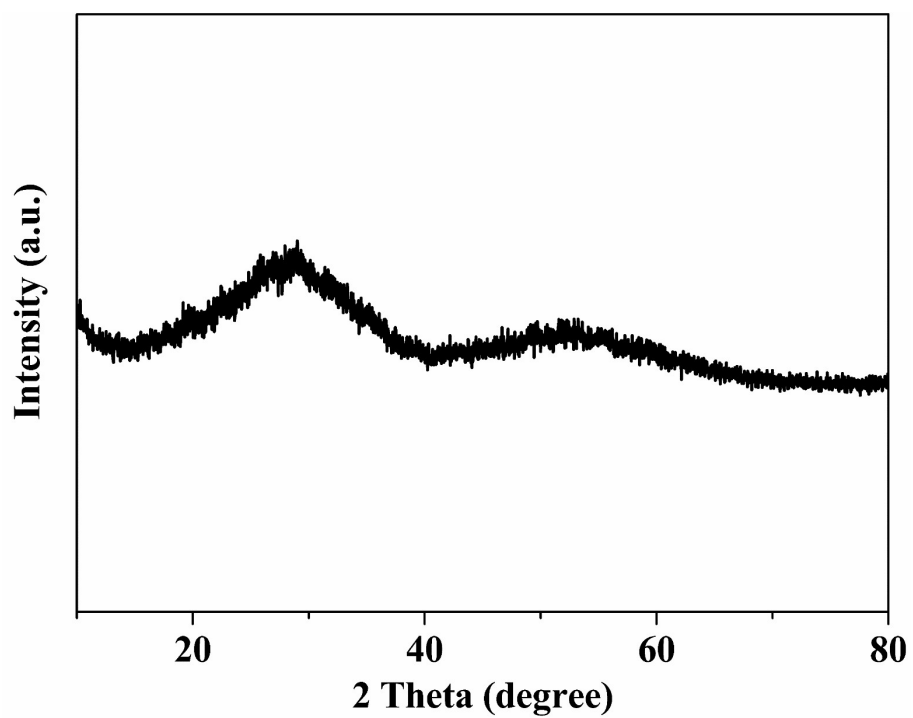

**Fig. S1.** XRD pattern of Sn-Mo precursor.

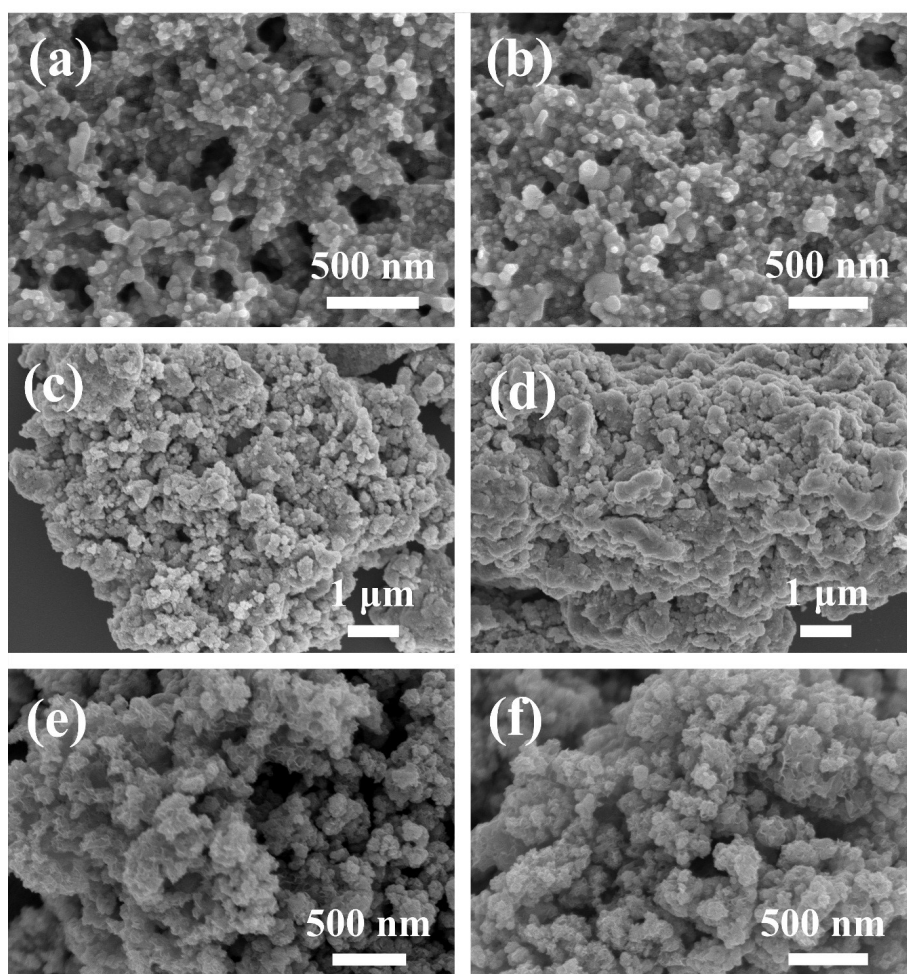

**Fig. S2.** SEM images of (a, b) Sn-Mo precursor; (c, d) SnO<sub>2</sub>; (e, f) MoSe<sub>2</sub>.

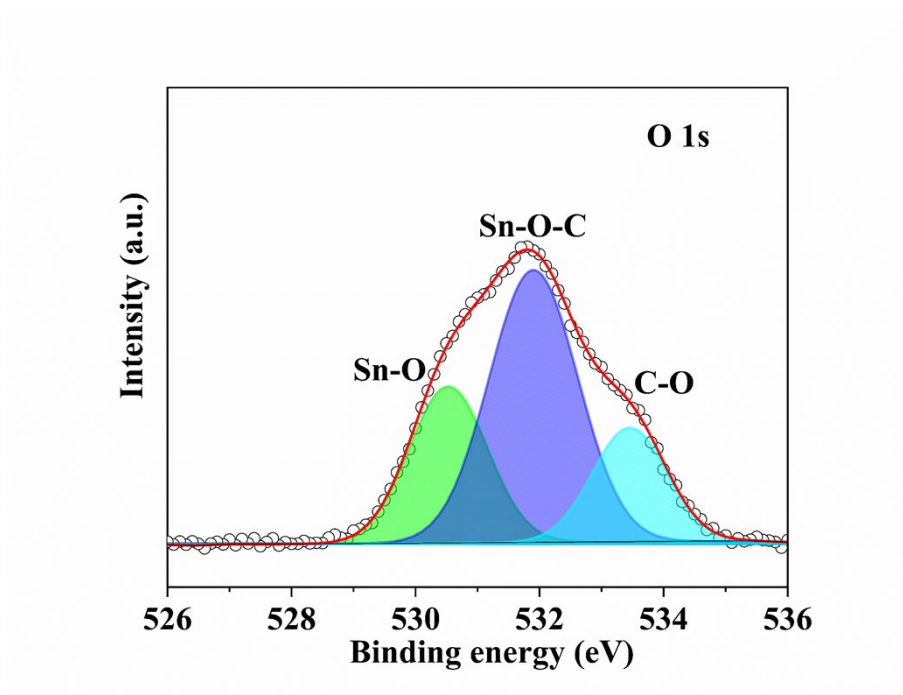

Fig. S3. High-resolution XPS spectra for O 1s.

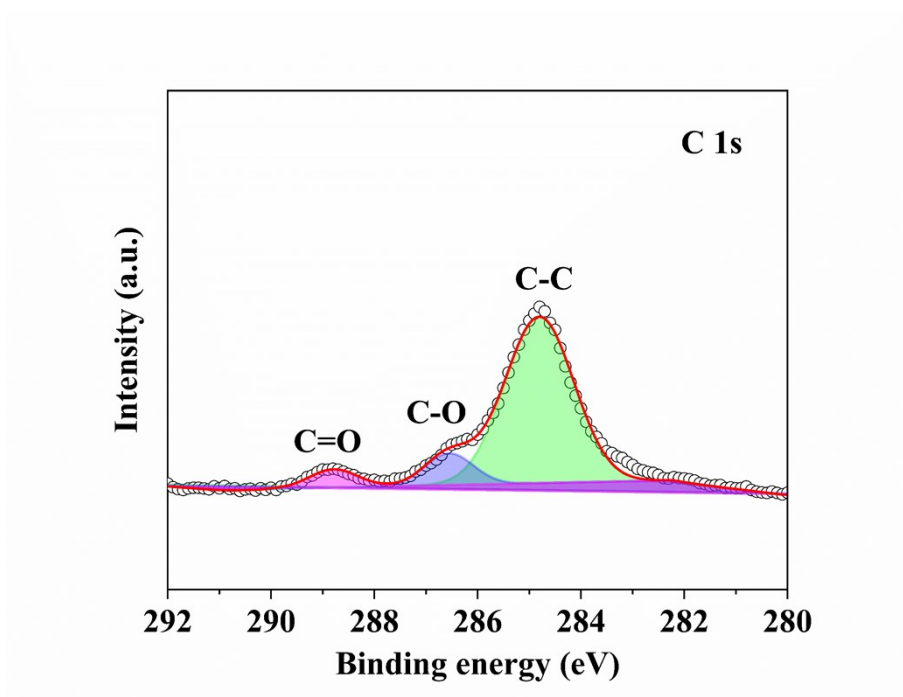

Fig. S4. High-resolution XPS spectra for C 1s.

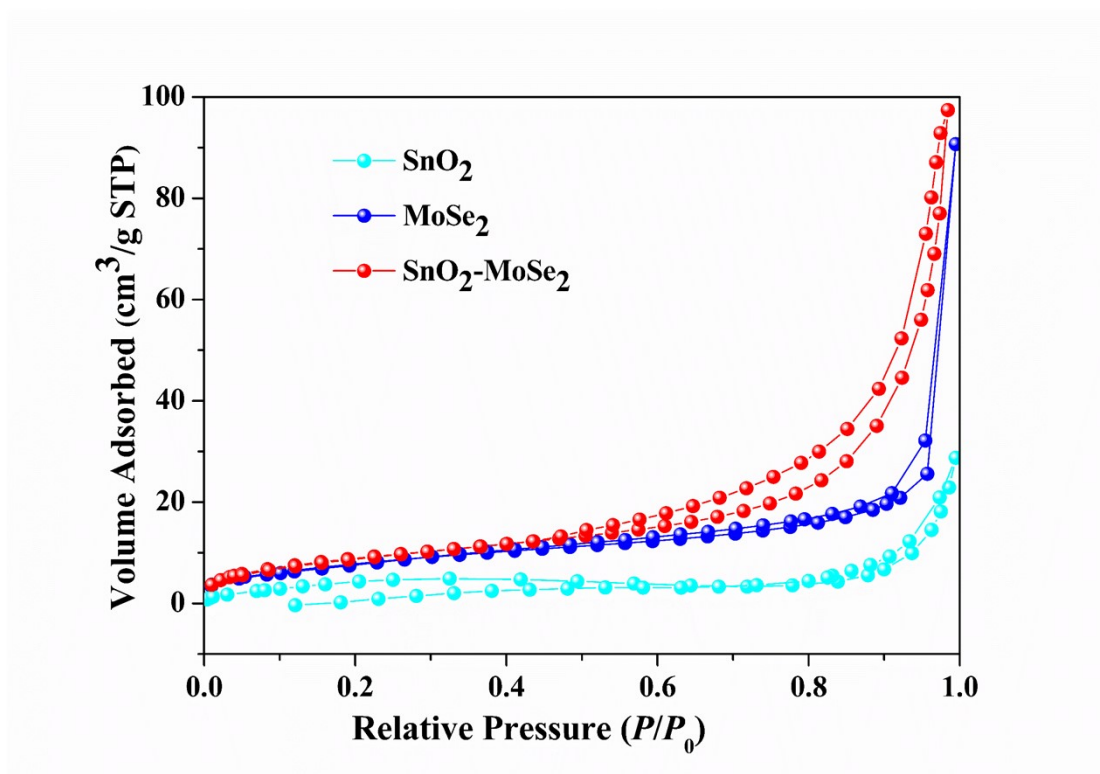

Fig. S5. N<sub>2</sub> adsorption/desorption isotherm curves.

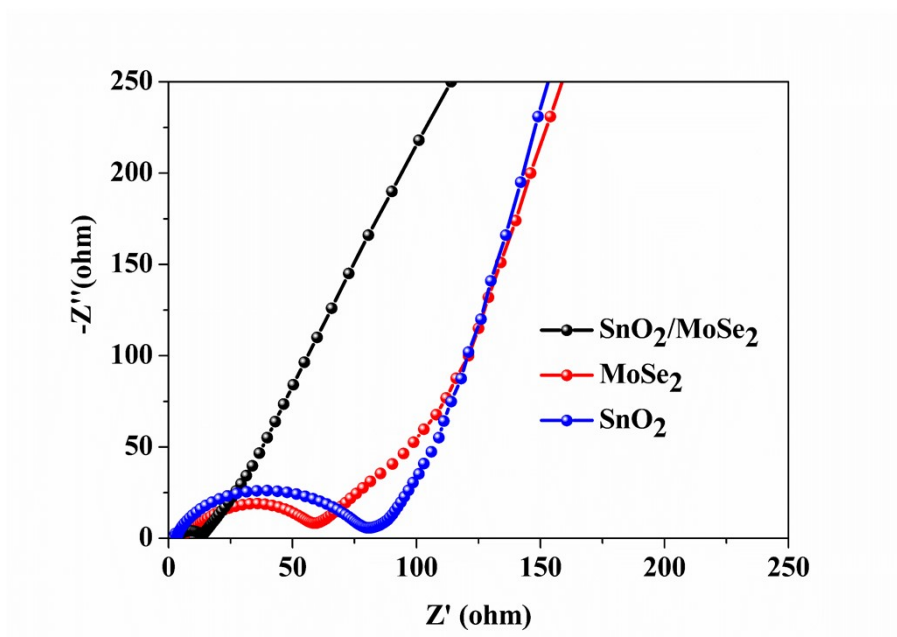

Fig. S6. The Nyquist plots of SnO<sub>2</sub>/MoSe<sub>2</sub>, SnO<sub>2</sub> and MoSe<sub>2</sub>.

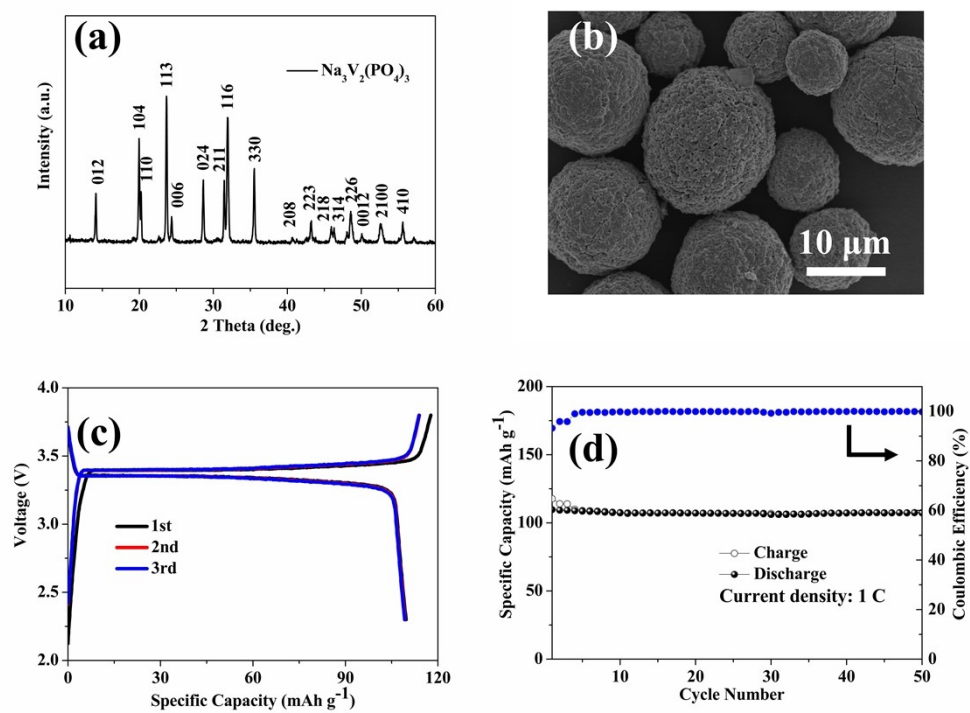

**Fig. S7.** Structural characterizations and electrochemical tests of  $\text{Na}_3\text{V}_2(\text{PO}_4)_3$  (NVP) cathode. (a) XRD and (b) SEM image of NVP. (c) GCD curves of the first three cycles at  $1\ \text{C}$ . (d) Cycling performance and corresponding CE at  $1\ \text{C}$ .

**Table S1.** The performance comparison of SnO<sub>2</sub>-MoSe<sub>2</sub> electrode with some reported electrode materials as full cell anodes.

| Electrode                                          | Cycle stability                         | Ref. No.  |
|----------------------------------------------------|-----------------------------------------|-----------|
| SnO <sub>2</sub> -MoSe <sub>2</sub>                | 106.8 mAh/g after 500 cycles at 0.5 A/g | This work |
| Co <sub>2.4</sub> Sn <sub>0.6</sub> O <sub>4</sub> | 73 mAh/g after 20 cycles at 0.05 C      | 1         |
| FeCo-Se@NC                                         | 252.3 mAh/g after 50 cycles at 0.5 A/g  | 2         |
| Fe <sub>7</sub> Se <sub>8</sub> -NCF               | 109 mAh/g after 200 cycles at 1 A/g     | 3         |
| ZnS@NC@MoS <sub>2</sub>                            | 79.9 mAh/g after 200 cycles at 0.5 A/g  | 4         |
| NC/MoSe <sub>2</sub> @NC                           | 104.8 mAh/g after 100 cycles at 0.1 A/g | 5         |

## References

- 1 G. Ali, M. Islam, D.S. Bhange, Y.H. Jung, M. Ge, Y.S. Chu, K.Y. Chung, Self-standing Co<sub>2.4</sub>Sn<sub>0.6</sub>O<sub>4</sub> nano rods as high performance anode materials for sodium-ion battery and investigation on its reaction mechanism. *Chemical Engineering Journal*, 2022, **439**, 135791.
- 2 P. Wang, J. Huang, J. Zhang, L. Wang, P. Sun, Y. Yang, Z. Yao, (2021), Coupling hierarchical iron cobalt selenide arrays with N-doped carbon as advanced anodes for sodium ion storage, *Journal of Materials Chemistry A*, 2021, **9**, 7248-7256.
- 3 L. Hu, C. Shang, X. Wang, G. Zhou, Fe<sub>7</sub>Se<sub>8</sub> encapsulated in N-doped carbon nanofibers as a stable anode material for sodium ion batteries, *Nanoscale Advances*, 2021, **3**, 231-239.
- 4 Y. Wang, W. Kang, D. Cao, X. Fan, H. Yang, Z. Yang, D. Sun, Yolk-shell ZnS@NC@MoS<sub>2</sub> nanoboxes with enhanced sodium storage capability, *Applied Surface Science*, 2022, **574**, 151715.
- 5 X. Luo, X. Kong, P. He, J. Shao, K. Li, W. Zhao, Designing advanced sandwiched 2D NC/MoSe<sub>2</sub>@ N-doped carbon arrays as new anode materials for efficient sodium storage, *Electrochimica Acta*, 2021, **399**, 139369.
